# Supplementary material for: Structure of the Mammalian Ribosome-Sec61 Complex to 3.4 Å Resolution
Source: PubMed Central journal article supplement (PMC4081569; doi:10.1016/j.cell.2014.05.024), 2014-06-19
Supplement: mmc1.pdf [file mmc1.pdf]

**Table S1.** Sequence Conservation between Pig and Human Ribosomes

| Small Subunit Proteins |            |            |
|------------------------|------------|------------|
| 40S Subunit            | 'Old' Name | % Identity |
| 18S rRNA               |            | 99.4       |
| eS1                    | S3A        | 98.0       |
| uS2                    | SA         | 99.0       |
| uS3                    | S3         | 100        |
| uS4                    | S9         | 100        |
| eS4                    | S4         | 100        |
| uS5                    | S2         | 99.0       |
| eS6                    | S6         | 100        |
| uS7                    | S5         | 100        |
| eS7                    | S7         | 100        |
| uS8                    | S15A       | 100        |
| eS8                    | S8         | 100        |
| uS9                    | S16        | 100        |
| uS10                   | S20        | 99.2       |
| eS10                   | S10        | 99.4       |
| uS11                   | S14        | 100        |
| uS12                   | S23        | 99.3       |
| eS12                   | S12        | 100        |
| uS13                   | S18        | 100        |
| uS14                   | S29        | 98.2       |
| uS15                   | S13        | 100        |
| uS17                   | S11        | 100        |
| eS17                   | S17        | 99.3       |
| uS19                   | S15        | 100        |
| eS19                   | S19        | 100        |
| eS21                   | S21        | 100        |
| eS24                   | S24        | 99.2       |
| eS25                   | S25        | 100        |
| eS26                   | S26        | 100        |
| eS27                   | S27        | 100        |
| eS28                   | S28        | 100        |
| eS30                   | S30        | 98.5       |
| eS31                   | S27A       | 100        |
| RACK1                  | RACK1      | 100        |

| Large Subunit Proteins |            |            |
|------------------------|------------|------------|
| 60S Subunit            | 'Old' Name | % Identity |
| Sec61 $\alpha$         |            | 100        |
| Sec61 $\beta$          |            | 100        |
| Sec61 $\gamma$         |            | 100        |
| 5S rRNA                |            | 100        |
| 5.8S rRNA              |            | 100        |
| 28S rRNA               |            | 94.1*      |
| uL1                    | L10A       | 100        |
| uL2                    | L8         | 100        |
| uL3                    | L3         | 99.0       |
| uL4                    | L4         | 96.8       |
| uL5                    | L11        | 98.9       |
| uL6                    | L9         | 100        |
| eL6                    | L6         | 90.7       |
| eL8                    | L7A        | 98.1       |
| uL10                   | P0         | 99.7       |
| uL11                   | L12        | 100        |
| uL13                   | L13A       | 98.0       |
| eL13                   | L13        | 96.7       |
| uL14                   | L23        | 100        |
| eL14                   | L14        | 90.7       |
| uL15                   | L27A       | 97.3       |
| eL15                   | L15        | 100        |
| uL16                   | L10        | 99.1       |
| uL18                   | L5         | 99.0       |
| eL18                   | L18        | 98.4       |
| eL19                   | L19        | 100        |
| eL20                   | L18A       | 99.6       |
| eL21                   | L21        | 100        |
| uL22                   | L17        | 100        |
| eL22                   | L22        | 99.2       |
| uL23                   | L23A       | 100        |
| uL24                   | L26        | 100        |
| eL24                   | L24        | 100        |
| eL27                   | L27        | 100        |
| eL28                   | L28        | 97.8       |
| uL29                   | L35        | 91.3       |
| eL29                   | L29        | 87.0       |
| uL30                   | L7         | 98.0       |
| eL30                   | L30        | 100        |
| eL31                   | L31        | 100        |
| eL32                   | L32        | 100        |
| eL33                   | L35A       | 100        |
| eL34                   | L34        | 100        |
| eL36                   | L36        | 100        |
| eL37                   | L37        | 99.0       |
| eL38                   | L38        | 100        |
| eL39                   | L39        | 100        |
| eL40                   | L40        | 100        |
| eL41                   | L41        | 100        |
| eL42                   | L36A       | 100        |
| eL43                   | L37A       | 95.7       |

\*The published porcine 28S sequence contains a ~550 nt gap in a non-conserved rRNA extension.

**Table S2.** Refinement and Model Statistics for the Final Models

| <b>Data Collection</b>                    | <b>60S</b> | <b>40S</b> |
|-------------------------------------------|------------|------------|
| Particles                                 | 80,019     | 36,667     |
| Pixel size (Å)                            | 1.34       | 1.34       |
| Defocus range (mm)                        | 2.5-3.5    | 2.5-3.5    |
| Voltage (kV)                              | 300        | 300        |
| Electron dose (e/Å <sup>2</sup> )         | 27         | 27         |
| <b>Model Composition</b>                  |            |            |
| Non-hydrogen atoms                        | 136,883    | 75,528     |
| Protein residues                          | 6,461      | 4,844      |
| RNA bases                                 | 5,181      | 1,869      |
| Ions                                      | 130        | 36         |
| <b>Refinement</b>                         |            |            |
| Resolution for refinement (overall) (Å)   | 3.5 (3.35) | 3.8 (3.5)  |
| Map sharpening B-factor (Å <sup>2</sup> ) | -57.5      | -59.8      |
| Average B factor (Å <sup>2</sup> )        | 37.0       | 65.7       |
| R factor†                                 | 0.36       | 0.40       |
| Fourier Shell Correlation (FSC)*          | 0.78       | 0.64       |
| Rms deviations                            |            |            |
| Bonds (Å)                                 | 0.015      | 0.011      |
| Angles (°)                                | 1.56       | 1.21       |
| Ramachandran plot                         |            |            |
| Favored (%)                               | 94.6       | 92.5       |
| Outliers (%)                              | 5.4        | 7.5        |

† R factor =  $\sum ||F_{\text{obs}}| - |F_{\text{calc}}| / \sum |F_{\text{obs}}|$

\* FSC =  $\sum (F_{\text{obs}} F_{\text{calc}}^*) / \sqrt{(\sum |F_{\text{obs}}|^2 \sum |F_{\text{calc}}|^2)}$
